# Supplementary material
Source: PubMed Central journal article supplement (PMC8295477)
Supplement: NIHMS1720503-supplement-Supplementary_Material_1.pdf [file NIHMS1720503-supplement-Supplementary_Material_1.pdf]

**Figure S1. Cytokine induction patterns of *Propionibacterium acnes* phylotypes in multiple donors.**

2.5x10<sup>6</sup>/mL peripheral blood mononuclear cells were cultured with 2.5x10<sup>6</sup>/mL live *P. acnes* in the (A-C) exponential phase or (D-E) stationary phase for (A, D) IFN- $\gamma$ , (B, E) IL-17, and (C, F) IL-10. ELISA was conducted on the supernatant to determine the concentration of IFN- $\gamma$ , IL-17, and IL-10. The cytokine concentrations normalized to the highest value induced by any *P. acnes* strain for each donor and cytokine. Each donor is represented by a different symbol. RT - Ribotype. p $\pm$  - presence or absence of a large plasmid.

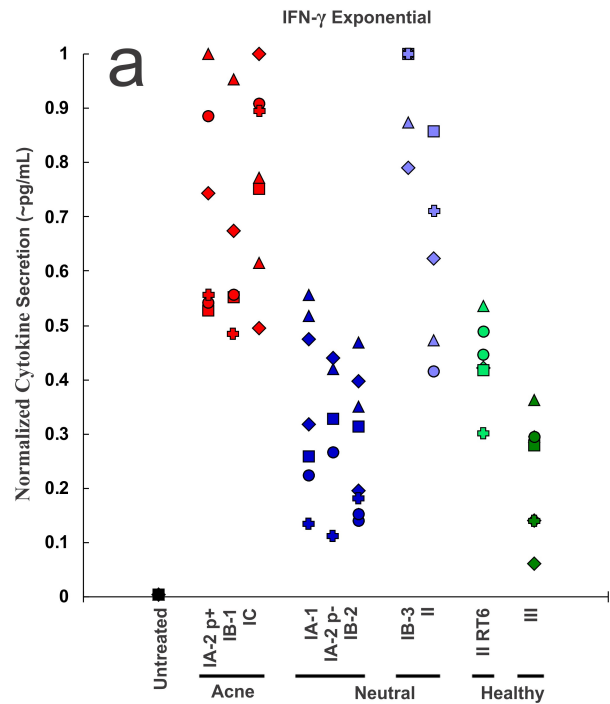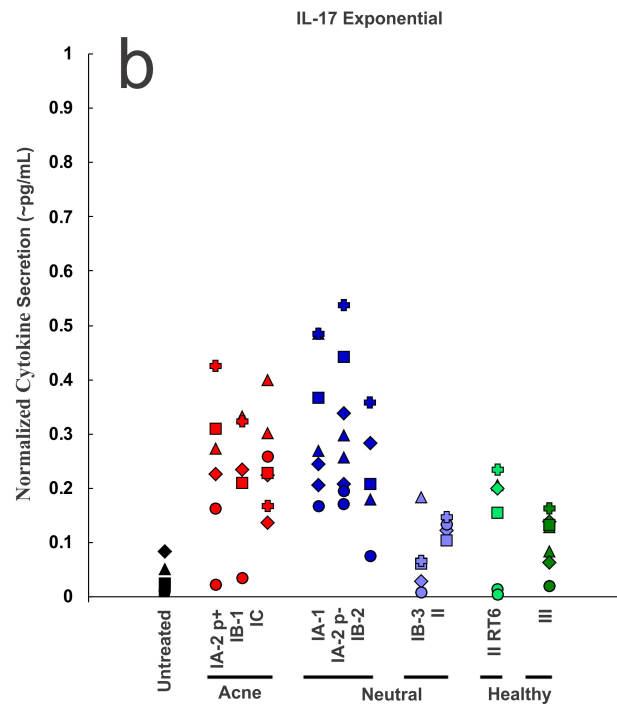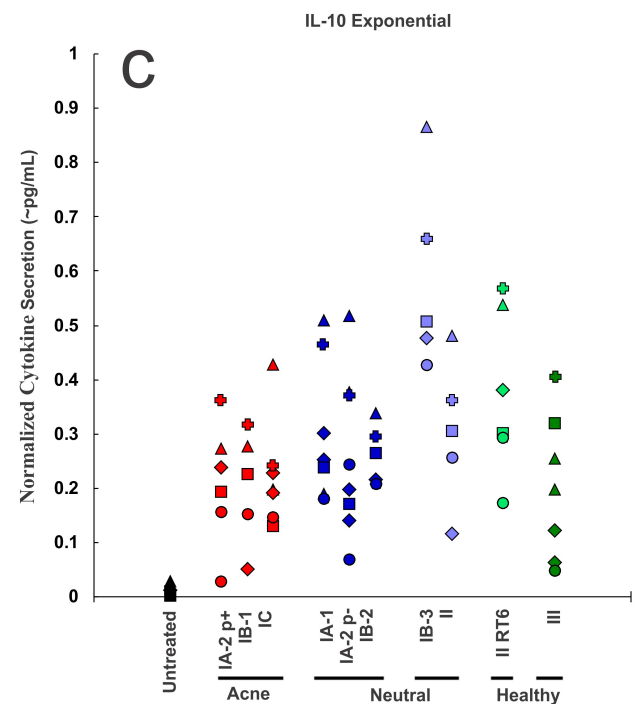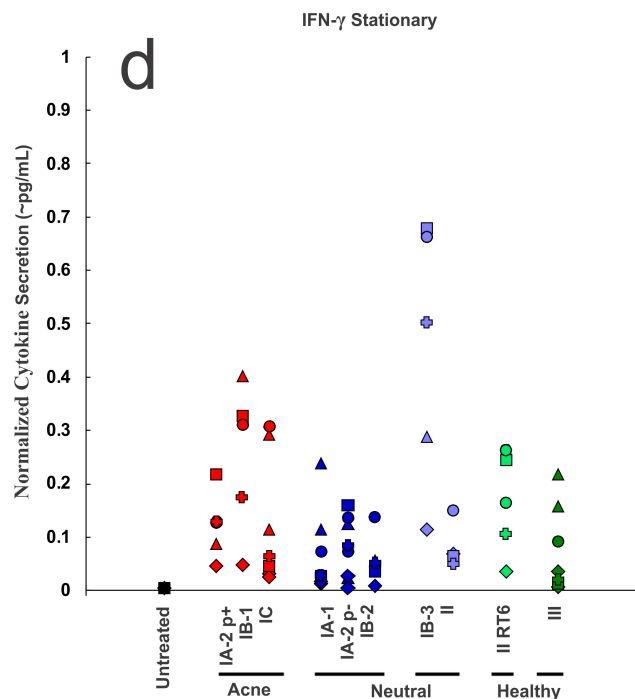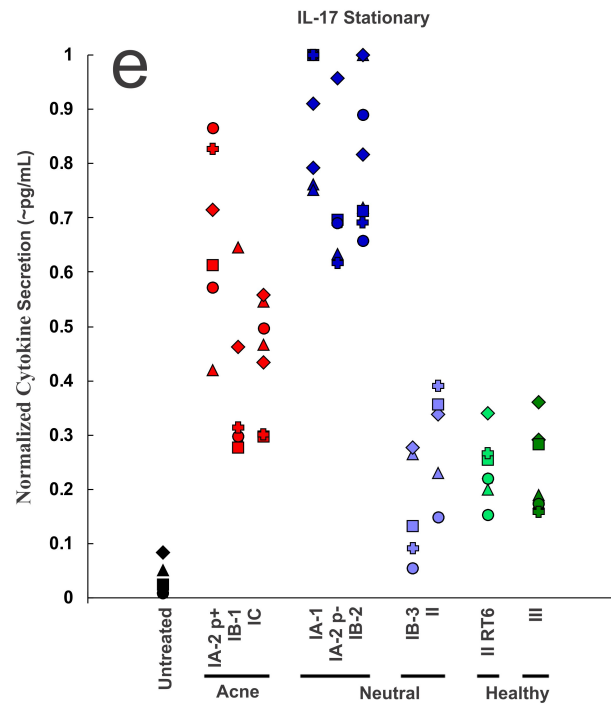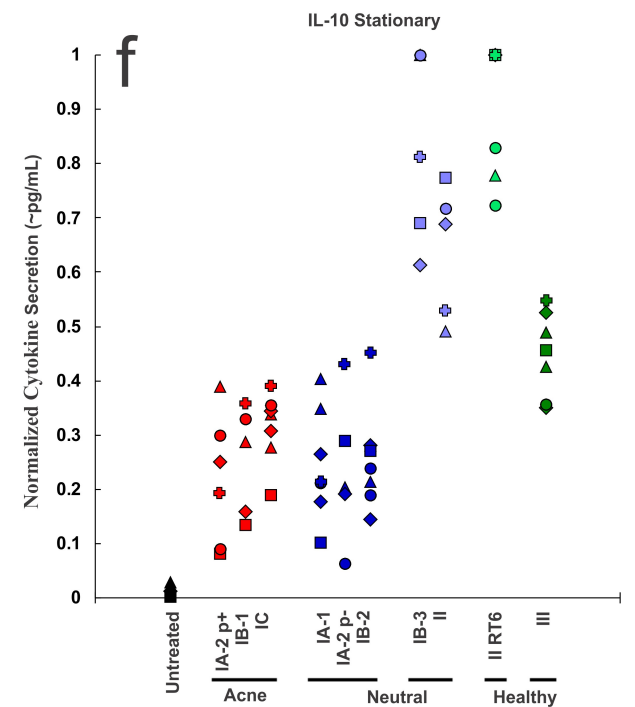

**Table S1. Strains of *Propionibacterium acnes* used in this study**

| <b>Strain</b>                                   | <b>Phylotype</b> | <b>Ribotype</b>   | <b>MLST<sub>4</sub></b>                         |
|-------------------------------------------------|------------------|-------------------|-------------------------------------------------|
| HL005PA2,<br>HL036PA1,<br>HL063PA1              | IA-1             | 1<br>Neutral      | IA <sub>1</sub> (CC1)<br>Acne                   |
| SK137<br>ATCC 6919                              | IA-2<br>(p-)     | 1<br>Neutral      | IA <sub>1</sub> (CC3)<br>Acne                   |
| HL005PA1,<br>HL043PA1,<br>HL096PA1              | IA-2<br>(p+)     | 4,5<br>Acne       | IA <sub>1</sub> (CC3)<br>Acne                   |
| HL110PA1,<br>HL053PA2                           | IB-1             | 8<br>Acne         | IA <sub>1</sub> (CC4)<br>Acne                   |
| HL013PA1,<br>HL067PA1,<br>HL059PA1,<br>HL059PA2 | IB-2             | 3<br>Neutral      | IA <sub>2</sub><br>Eye Infection                |
| HL030PA1,<br>KPA171202                          | IB-3             | 1<br>Neutral      | IB<br>Medical Device and Tissue Infections      |
| PRP38,<br>5-1-3,<br>5-1-5                       | IC               | 5<br>Acne         | IC<br>Acne                                      |
| HL001PA1,<br>HL060PA1                           | II               | 2<br>Neutral      | II<br>Medical Device and Blood Infections       |
| HL042PA3,<br>HL110PA3,<br>HL110PA4              | II               | 6<br>Healthy Skin | II (ST7)<br>Medical Device and Blood Infections |
| ASN12,<br>12S,<br>2-4                           | III              | N/A               | III<br>Healthy Skin and Spinal Disc Infection   |

Phylotype and ribotype are from Fitz-Gibbon *et al.*, 2013 and Tomida *et al.*, 2013. Ribotype shows only the major ribotype(s) of the phylotype and only skin disease association. p+ and p- designate the possession of a large plasmid or lack thereof for phylotype IA-2 strains. Multi-Locus Sequence Typing (MLST<sub>4</sub>) phylotypes are from McDowell *et al.*, 2014, in which disease association is for the entire phylotype (CC Clonal Complex and ST Sequence Type are displayed for reference). ATCC 6919, 5-1-3, 5-1-5, ASN12, 12S, and 2-4 strain classifications are based on MLST. Others are based on whole-genome sequencing.

**Table S2. Maximum Cytokine Levels in PBMC Experiments**

| <b>Donor</b> | <b>IFN-<math>\gamma</math></b> | <b>IL-17</b> | <b>IL-10</b> |
|--------------|--------------------------------|--------------|--------------|
| 1            | 2225                           | 6612         | 5167         |
| 2            | 10740                          | 3342         | 1713         |
| 3            | 7855                           | 3609         | 4920         |
| 4            | 7926                           | 2019         | 8938         |
| 5            | 2629                           | 3551         | 10073        |

Table shows the maximum cytokine concentration induced by any *P. acnes* strain in pg/mL.
